# Supplementary material
Source: bioRxiv or medRxiv preprint supplement (https://www.biorxiv.org/highwire/filestream/46424/field_highwire_adjunct_files/0/131292-1.pdf)
Supplement: Supplementary file [file 131292-1.pdf]

1 **Supporting information for: *A persistent lack of international representation on***  
2 ***editorial boards in environmental biology***

3 Johanna Espin<sup>1,2</sup>, Sebastian Palmas<sup>3</sup>, Farah Carrasco-Rueda<sup>4</sup>, Kristina Riemer<sup>5</sup>, Pablo  
4 E. Allen<sup>6</sup>, Nathan Berkebile<sup>4</sup>, Kirsten A. Hecht<sup>4,7</sup>, Kay Kastner-Wilcox<sup>8</sup>, Mauricio M.  
5 Núñez-Regueiro<sup>5,\*</sup>, Candice Prince<sup>9</sup>, Constanza Rios<sup>4</sup>, Erica Ross<sup>3</sup>, Bhagatveer  
6 Sangha<sup>10</sup>, Tia Tyler<sup>9</sup>, Judit Ungvari-Martin<sup>11,7,\*\*</sup>, Mariana Villegas<sup>5</sup>, Tara T. Cataldo<sup>12</sup>,  
7 and Emilio M. Bruna<sup>2,5\*\*\*</sup>

8  
9 <sup>1</sup> Dept. of Sociology and Criminology & Law, University of Florida, Gainesville, USA

10 <sup>2</sup> Tropical Conservation and Development Program, Center for Latin American Studies,  
11 University of Florida, Gainesville, USA

12 <sup>3</sup> School of Forest Resources and Conservation, University of Florida, Gainesville, USA

13 <sup>4</sup> School of Natural Resources and Environment, University of Florida, Gainesville, USA

14 <sup>5</sup> Dept. of Wildlife Ecology & Conservation, University of Florida, Gainesville, USA

15 <sup>6</sup> Entomology and Nematology Dept., University of Florida, Gainesville, USA

16 <sup>7</sup> Florida Museum of Natural History, University of Florida, Gainesville, USA

17 <sup>8</sup> Soil and Water Sciences Dept., University of Florida, Gainesville, USA

18 <sup>9</sup> Dept. of Environmental Horticulture, University of Florida, Gainesville, USA

19 <sup>10</sup> Horticultural Sciences Dept., University of Florida, Gainesville, USA

20 <sup>11</sup> Dept. of Biology, University of Florida, Gainesville, USA

21 <sup>12</sup> Martson Science Library, University of Florida, Gainesville, USA

22  
23 \*\*\*Corresponding author: Phone: (352) 846-0634, email: embruna@ufl.edu

|    |                                                   |
|----|---------------------------------------------------|
| 24 | <b>CONTENTS</b>                                   |
| 25 |                                                   |
| 26 | 1. Methods                                        |
| 27 | a. Data Collection: Editors                       |
| 28 | b. Overview of Analyses: Editors                  |
| 29 | c. Metrics of diversity and community composition |
| 30 | d. Statistical Analyses: Editors                  |
| 31 | e. Data Collection and Analysis: Authors          |
| 32 | 2. Results                                        |
| 33 | 3. Table A                                        |
| 34 | <b>4. Figure A</b>                                |
| 35 | <b>5. References</b>                              |

## 36 1. METHODS

### 37 1a. Data collection: Editors

38 Our analyses are based on the 1985-2014 editorial boards of 24 journals (Table  
39 S1). We selected these journals because they are considered high-profile and  
40 prestigious outlets in which to publish research from a range of environmental and  
41 natural resource disciplines. Whenever possible we selected journals published by  
42 academic societies with global membership and comparable publisher-owned outlets for  
43 similar research (e.g., *Biotropica* and *Journal of Tropical Ecology*, *Conservation Biology*  
44 and *Biological Conservation*). We chose 1985 as a starting point because we wanted to  
45 determine if there had been changes in the composition of editorial boards of high-  
46 profile disciplinary journals after the emergence of new centers of scientific productivity  
47 in Latin America and Asia [1,2]. This meant excluding several high-profile journals  
48 because they only began publishing in the past decade (e.g., *Ecology Letters*, *Molecular*  
49 *Ecology*). We did, however, include three journals that were first published in 1987:  
50 *Conservation Biology*, *Functional Ecology*, and *Landscape Ecology* (Table S1).

51 Using the first issue of the journal published in each calendar year, we recorded  
52 the names of all editorial board members, their editorial positions, their institutions  
53 (when given), and the country in which they were based. The 1985-2013 data from 10  
54 of these journals were collected by Cho et al. [3] and archived at the Dryad Digital  
55 Repository [4]; note we were able to collect the 1986-1989 data for *Journal of Tropical*  
56 *Ecology* missing in Cho et al. for the analyses presented here and include these data in  
57 the archived dataset accompanying this paper [5]. After consolidating the two datasets,  
58 we disambiguated all author names and assigned each editor a unique identification

59 number.

60 Journals often have different titles for positions with similar responsibilities; these  
61 titles can change over time and new positions are frequently created or eliminated. We  
62 therefore used the same definitions as Cho et al. [3] to assign editorial board members  
63 to one of four categories based on their primary responsibilities. These categories were:

- 64 1) **Editor-in-Chief (EIC)**. The EIC oversees the journal and is ultimately  
65 responsible for editorial policy, standards, and practices, including nominating  
66 or appointing new Editorial board members. Some journals have co-Editors-in-  
67 Chief (e.g., *North American Journal of Fisheries Management*, *Oecologia*).
- 68 2) **Associate Editors (AE)**. AEs assist the EIC with their responsibilities and often  
69 take the lead on some aspects of journal administration. Some AEs oversee all  
70 submissions in a specific subject area or about a geographic region. Not all  
71 journals have AEs, and some had AEs for only a subset of the survey period.
- 72 3) **Subject Editors (SE)**. SEs oversee manuscript review. SEs for some journals  
73 make final decisions on manuscripts after receiving reviewer feedback (e.g.,  
74 *Ecology*) while SEs for other journals provide recommendations upon which  
75 a senior editor (i.e., EIC, AE) makes the final decision (e.g., *Biotropica*, *J.*  
76 *Ecology*). They also provide feedback on journal policy and administration. SEs  
77 are sometimes referred to by other names, including Handling Editors, the  
78 Board of Editors (e.g., *Ecology*, *Biological Conservation*) and the Editorial  
79 Committee (e.g., *Annual Review of Ecology, Evolution, and Systematic*,  
80 *American Journal of Botany*). In addition, two journals used the title of  
81 “Associate Editor” for Board members with SE responsibilities (i.e., *American*

82 *Journal of Botany, North American Journal of Fisheries Management*); they  
83 were considered SEs in our analyses.

84 4) **Special Editors (SpE)**: Special Editors include editors tasked with soliciting  
85 papers for special article categories, organizing special sections or volumes,  
86 reviewing data archives or computer code, or coordinating reviews of recently  
87 published books. Examples of special Editors include those responsible for the  
88 “Biological Flora” section of the *Journal of Ecology*, editors for *Ecology*’s  
89 “Concept Section”, “Data Archive”, “Special Features”, and “Invited Papers”, the  
90 Editors of “Natural History Miscellany” for the *American Naturalist*, and  
91 “Commentary” Editors for *Biotropica*. For many journals the Special Editors also  
92 serve as the Subject Editors of “standard” manuscript submissions.

93 We standardized the countries in which editor institutions were based by  
94 converting them to their respective ISO 3166-1 alpha-3 codes (ISO 2016). Note that as  
95 per [6] we count editors based in territories or overseas departments separately from  
96 those in the sovereign state (e.g., Editors based in Puerto Rico or French Guiana are  
97 counted separately from those in, respectively, the USA and France). In cases where  
98 the name of the country changed between 1985 and 2014 we used for analyses the  
99 contemporary name for the country where the editor’s home institution was based (e.g.,  
100 an editor based in Yugoslavia before 1993 would be assigned to Bosnia and  
101 Herzegovina, Croatia, Macedonia, Montenegro, Serbia, or Slovenia).

102 We also assigned the country in which each editor was based to its World Bank  
103 Global Region and National Income category [7]. The geographic regions are: (1)  
104 Europe/Central Asia (2) East Asia/Pacific, (3) Latin America/Caribbean, (4) Sub-

105 Saharan Africa, (5) South Asia, (6) Middle East/North Africa, (7) North America (i.e.,  
106 Canada and the United States). The National Income categories are: (1) high-income  
107 Organization for Economic Cooperation and Development (OECD) member (*per capita*  
108 GNI  $\geq$  \$12476), (2) high-income non-OECD member (*per capita* GNI  $\geq$  \$12476) (3)  
109 upper-middle income (*per capita* GNI \$4036-\$12475), (4) lower-middle income (*per*  
110 *capita* GNI \$1026-\$4035), (5) low-income (*per capita* GNI  $\leq$  \$1025) [7].

111 Although the country in which an editor is based and the editor's nationality are  
112 frequently conflated [e.g., 8,9], it is important to emphasize that these are not  
113 interchangeable [10]. Some studies have avoided this problem by explicitly stating they  
114 are using institutional affiliation as a proxy for nationality [e.g., 11], which in some cases  
115 may be a reasonable assumption [10]. We make we make no such assumptions about  
116 nationality here – our analyses are explicitly of the country, region, or national economic  
117 category in which a scientist is based, irrespective of their citizenship. We do so for  
118 several reasons. First, citizenship is not a precondition for serving on editorial boards,  
119 and hence it is unlikely to be the reason why scientists are invited (or not) to serve.  
120 Second, the national and institutional context in which a scientist is embedded (e.g.,  
121 availability of financial resources, incentives) likely has a greater impact on their ability  
122 to serve as an editor or publish research than their citizenship [6]. Third, some of the  
123 skills that make international editors especially important in environmental biology, such  
124 as in-depth familiarity with local ecosystems or socio-economic conditions, are also  
125 independent of citizenship.

126 Finally, throughout the text we use the terms “Global North” and “Global South”.  
127 The term Global North refers to the group of economically developed countries with high

128 per capita Gross Domestic Product (GDP) that collectively concentrate most global  
129 wealth. Because national development is a product of cultural and political history, not  
130 all countries in this classification are in the Northern Hemisphere (e.g., Australia, New  
131 Zealand). The “Global South” comprises the world’s ‘developing’ or ‘emerging’  
132 economies, most of which are in Latin America, Asia, Africa, and the Middle East [12].

133

#### 134 **1b. Overview of Analyses: Editors**

135 Our primary goal was to assess the geographic diversity of the community of  
136 scientists serving as editors, not to compare individual journals. We therefore pooled the  
137 data from all journals for our analyses. Editors serving on multiple boards in the same  
138 year were only counted once. We conducted our analyses using all four editor  
139 categories – EIC, AE, SE, and SpE – and use the term ‘editorial board’ to refer to the  
140 collection of scientists comprising all four categories. As per Cho et al. [3] we did not  
141 include advisors without editorial responsibilities, such as the *American Journal of*  
142 *Botany’s* “Section Representatives” or the “Publication Board” for *Oikos*, nor the staff  
143 primarily responsible for the administrative aspects of journal publishing (e.g.,  
144 production editors, managing editors, editorial assistants).

145

#### 146 **1c. Metrics of diversity and community composition**

147 One can formally quantify the diversity of a group, such as the assemblage of  
148 species in a site, using indices derived from information theory [13]. The most  
149 commonly used diversity indices are calculated using two types of data: a sample’s

150 “Richness” (i.e., the number of distinct species or categories it contains) and it’s  
 151 “evenness” (i.e., the relative abundance of each species or category in the sample) [13].

152 One of the most robust and widely used indices is the reciprocal transformation  
 153 of Simpson’s Index,  $D_2$ , calculated as:

$$154 \quad D_2 = \frac{1}{\sum_{i=1}^R p_i^2}$$

155 where where  $R$  is the greatest value of richness recorded in any time period sampled  
 156 between  $t_{\text{initial}}$  and  $t_{\text{final}}$  and  $p_i$  is the proportional abundance of type  $i$  at time  $t$ . Simpson’s  
 157 s Index has a number of advantages over other common diversity indices (e.g.,  
 158 Shannon’s Index). The first is ease of interpretation – when it is expressed as  $D_2$ , larger  
 159 values indicate greater diversity, with maximum potential diversity equal to the greatest  
 160 value of richness in any one sample year (or site, in the case of spatial comparisons).  
 161 Second, estimates of diversity for different groups or time intervals are directly  
 162 comparable, even if they differ in sampling effort or richness [13]. Finally, one can use  
 163 Simpson’s index to calculate a value of Evenness that is mathematically independent of  
 164 Richness and therefore also comparable across groups, locations, or intervals.  
 165 Simpson’s Evenness is calculated using  $D_2$  and  $R$  as follows:

$$166 \quad E = \frac{D_2}{R}$$

167 Values for Simpson’s Evenness range from 0-1, with 1 being a completely even  
 168 distribution (i.e., all types in a sample are represented by the same number of  
 169 individuals). Note that the independence of Richness and Evenness means that a  
 170 community can have low richness but high evenness. It is important to note that  
 171 Simpson’s Diversity will increase as Richness increases, it is much more sensitive to



172 how equitably individuals are distributed between the different types in a sample (i.e., it  
173 is a 'dominance' or 'evenness' index, sensu [13]).

174       Using our data on board membership, we calculated and report here (1) the  
175 Geographic Richness (GR) editors each year from 1985-2014, (2) the Geographic  
176 Diversity of editors each year from 1985-2014 (GD, calculated as  $D_2$ ), and (3) the  
177 Simpson's Evenness of the editorial community each year from 1985-2014. We also  
178 generated rarefaction curves to calculate the cumulative Geographic Richness, i.e., the  
179 total number of unique countries from 1985 through 2014 in which editors were based.

180

#### 181 ***1d. Statistical Analyses: Editors***

182       The organization, visualization, and analysis of data, including the  
183 disambiguation of names and assignment of unique identification numbers, was carried  
184 out using the R programming language [14] using the `tidyr`, `dplyr`, and `ggplot2`  
185 libraries [15]. All newly collected data have been permanently archived in the Dryad  
186 Digital Repository [5]; the version of the code used in this paper is archived online [16]  
187 and is also publicly available for download and improvement [17].

188       To determine if there were temporal trends in the composition of the editorial  
189 community, we calculated the Geographic Richness (GR), Diversity (GD), and  
190 Evenness (GE) of each year's community of editors using the `vegan` library [18]. We  
191 then tested for changes in GR, GD, and GE over time with linear models fit with  
192 Generalized Linear Squares (GLS). We used this approach because it allows testing for  
193 and removing the effects of potential temporal autocorrelation resulting from editors  
194 serving terms of multiple, consecutive years.

195 We constructed models in which the dependent variable was the value of each  
 196 metric in each year and Year and the Number of Editors in a year were included as  
 197 factors independently or in combination. Preliminary analyses indicated that there was  
 198 autocorrelation in all response variables, so we included it in all models as an auto-  
 199 regressive moving average (ARMA) process with  $p = 1$  and  $q = 0$ . We then used Akaike  
 200 Information Criteria corrected for smaller sample sizes (i.e., AICc) to identify the model  
 201 whose combination of main effects and interactions provided best fit the data. A  
 202 significant effect of Year, either alone or in combination with Editor Number, would  
 203 indicate a change over time in Richness, Diversity, and Evenness. These analyses were  
 204 carried out using the libraries `nlme` [19] and `MuMIn` [20].

205 Finally, we used  $\chi^2$  tests to compare the number of unique editors (all years  
 206 combined) based in each World Bank global region and national income category.

207

### 208 **1e. Data collection & Analysis: Authors**

209 To complement our survey of the community of editors, we also collected data on  
 210 the country in which the authors of articles published in our focal journals were based.

211 We did a series of Thomson-Reuters Web of Science (WOS) searches with the  
 212 following search string:

213 *SO=(Agronomy Journal OR American Journal of Botany OR Journal of Applied*  
 214 *Ecology OR American Naturalist OR Journal of Biogeography OR Annual Review*  
 215 *of Ecology\*, OR Journal of Ecology OR Biological Conservation OR Journal of*  
 216 *Tropical Ecology OR Biotropica OR Journal of Zoology OR Conservation Biology*  
 217 *OR Landscape Ecology OR Ecography OR Holarctic Ecology OR Ecology OR*

218 *New Phytologist OR Evolution OR North American Journal of Fisheries*  
219 *Management OR Forest Ecology and Management OR Oecologia OR Functional*  
220 *Ecology OR Oikos OR Journal of Animal Ecology OR Plant Ecology OR*  
221 *Vegetatio) AND PY=(X)*

222 where  $X$  is each individual year from 1985-2014. We then downloaded the WOS-  
223 generated frequency table reporting the countries in which the authors of articles  
224 published that year were based and standardized their home countries using same  
225 methods as for editors. Note that these WOS tables do not provide the total number of  
226 authors from each country, only how many times a country was represented in year's  
227 collection of articles. Consequently, the data can be used to calculate the Geographic  
228 Richness of authors, but not abundance-based metrics such as Diversity and Evenness.  
229 Note there is no fractional allocation of authors with multiple institutional addresses in  
230 the WOS-generated tables, e.g., a paper whose author has a primary address in the  
231 USA and a secondary one in Panama results in both Panama and USA being 'credited'  
232 for that author. This could potentially result in an overestimate of the total number of  
233 countries represented by authors.

234

## 235 **2. RESULTS**

236 We identified  $N = 3829$  scientists from  $N = 71$  countries that served as editors for  
237 our focal journals from 1985 to 2014. Over the course of our survey period the size of  
238 the editor community increased almost 420%: from  $N=316$  in 1985 to  $N=1340$  in 2014.  
239 The number of countries represented per year increased from  $N=34$  in 1985 to  $N=49$  in  
240 2015.

241           After accounting for autocorrelation, the increase in Geographic Richness over  
242 time was best explained by the number of editors (S1 Text Table A, S1 Text Fig A). In  
243 contrast, the best fit for the data on Geographic Diversity was the model that included  
244 only the intercept, indicating no increase in diversity over the course of our survey  
245 period even after taking into account the increasing number of editors over time (Table  
246 A in S1 Text). The models that best fit the data on Geographic Evenness also included  
247 Year as a main effect. Despite starting at an already low value ( $\text{Evenness}_{1984} = 0.11$ ),  
248 evenness declined significantly over our survey period due to a significant effect of  
249 editor number (Table A in S1 Text, Figure B in S1 Text). This was true even after  
250 removing the effect of temporal autocorrelation, and indicates that the addition of new  
251 editors is increasing species Richness, most new editors are from countries that are  
252 already well-represented. Finally, there was a significant difference in the frequency of  
253 editors representing different national income categories ( $\chi^2 = 13038$ ,  $df = 4$ ,  $p <$   
254  $0.0001$ ) and geographic regions ( $\chi^2 = 8263$ ,  $df = 6$ ,  $p < 0.0001$ ). Editors were  
255 overwhelmingly from High-income OECD countries or North America and  
256 Europe/Central Asia (Fig 2). The only region to make substantial gains from 1985-2014  
257 was East Asia and the Pacific (5.5% to 11%), though this did not result in greater  
258 representation of national income categories (S1 Text Fig B) because most of these  
259 editors were based in Australia and New Zealand.

260           From 1985-2014 there were 100,031 articles published in our focal journals. In  
261 1985 the authors of these articles were based in 66 countries. By 2014, authors from N  
262 = 128 countries had published in the same journals (Fig 3).

**TABLE A.** Model selection for the effect of Year (model 2), the Total Number of Editors (model 3), both Year and Total Number of Editors (model 4), and Year, Editor Number, and their Interaction (Model 5) on three metrics of editor community composition fit to 30 observations (i.e., total degrees of freedom). All models included an ARMA(1) autocorrelation term. The best-fit model is indicated in bold.

### Geographic Richness

| <u>Model</u>            | <u>dAIC</u> | <u>df</u> | <u>weight</u> |
|-------------------------|-------------|-----------|---------------|
| 1 Intercept             | 17.44       | 3         | 0             |
| 2 Year                  | 11.34       | 4         | 0.003         |
| <b>3 No. of Editors</b> | <b>0</b>    | <b>4</b>  | <b>0.75</b>   |
| 4 Year + No. of Editors | 2.76        | 5         | 0.19          |
| 5 Year * No. of Editors | 5.29        | 6         | 0.05          |

### Geographic Diversity

| <u>Model</u>            | <u>dAIC</u> | <u>df</u> | <u>weight</u> |
|-------------------------|-------------|-----------|---------------|
| <b>1 Intercept</b>      | <b>0</b>    | <b>3</b>  | <b>0.45</b>   |
| 2 Year                  | 2.66        | 4         | 0.12          |
| 3 No. of Editors        | 2.65        | 4         | 0.12          |
| 4 Year + No. of Editors | 5.17        | 5         | 0.03          |
| 5 Year * No. of Editors | 0.93        | 6         | 0.28          |

### Geographic Evenness

| <u>Model</u>                   | <u>dAIC</u> | <u>df</u> | <u>weight</u> |
|--------------------------------|-------------|-----------|---------------|
| 1 Intercept                    | 2.59        | 3         | 0.08          |
| 2 Year                         | 0.4         | 4         | 0.30          |
| 3 No. of Editors               | 0.1         | 4         | 0.29          |
| 4 Year + No. of Editors        | 2.87        | 5         | 0.07          |
| <b>5 Year * No. of Editors</b> | <b>0</b>    | <b>6</b>  | <b>0.30</b>   |

**Fig. A.** Relationship between Geographic Richness and the size of the Editor community (1995-2014, pooled data from N=24 journals).

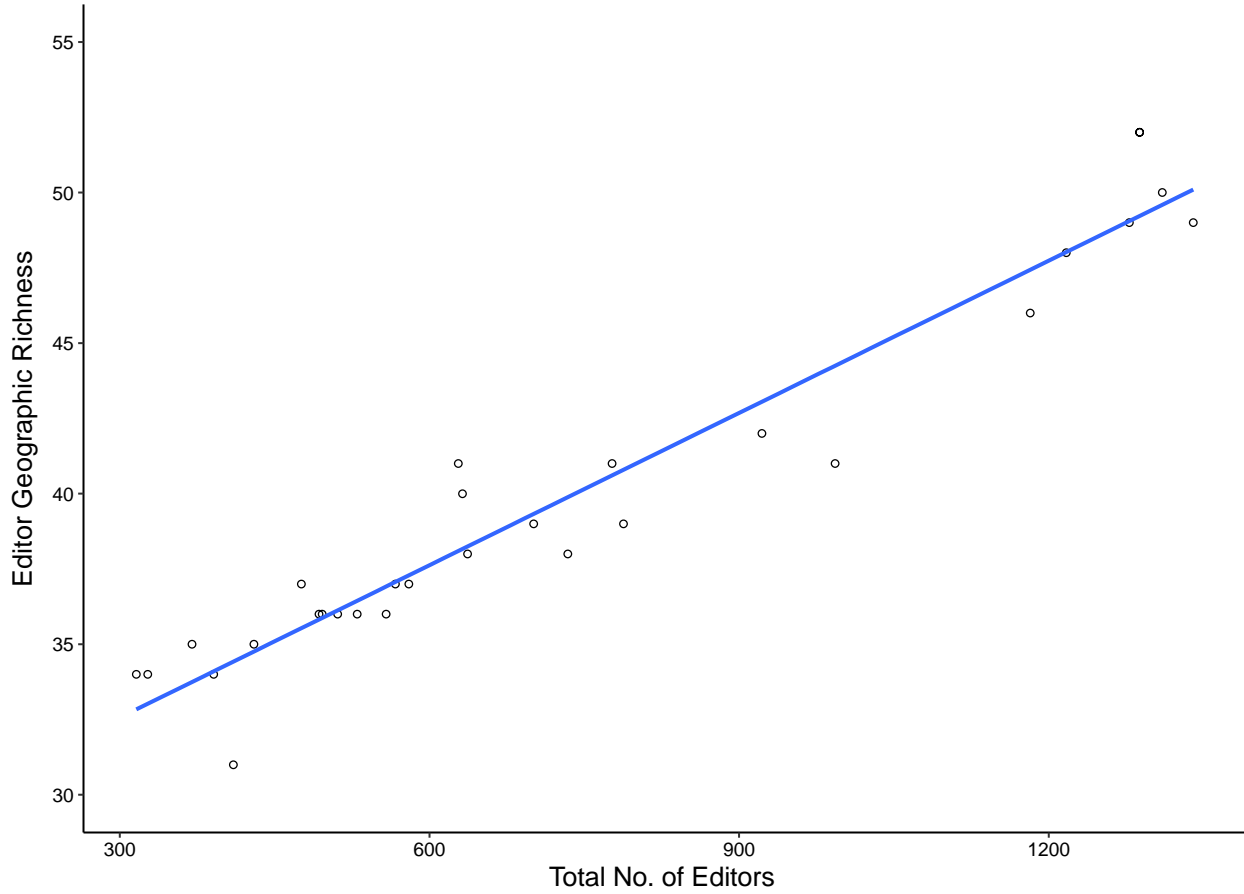

Fig. B. Geographic Evenness of the community editors in environmental biology (1985-2014). Values of Evenness range from 0-1, with 1 indicating editors are equally distributed among all countries represented in that year.

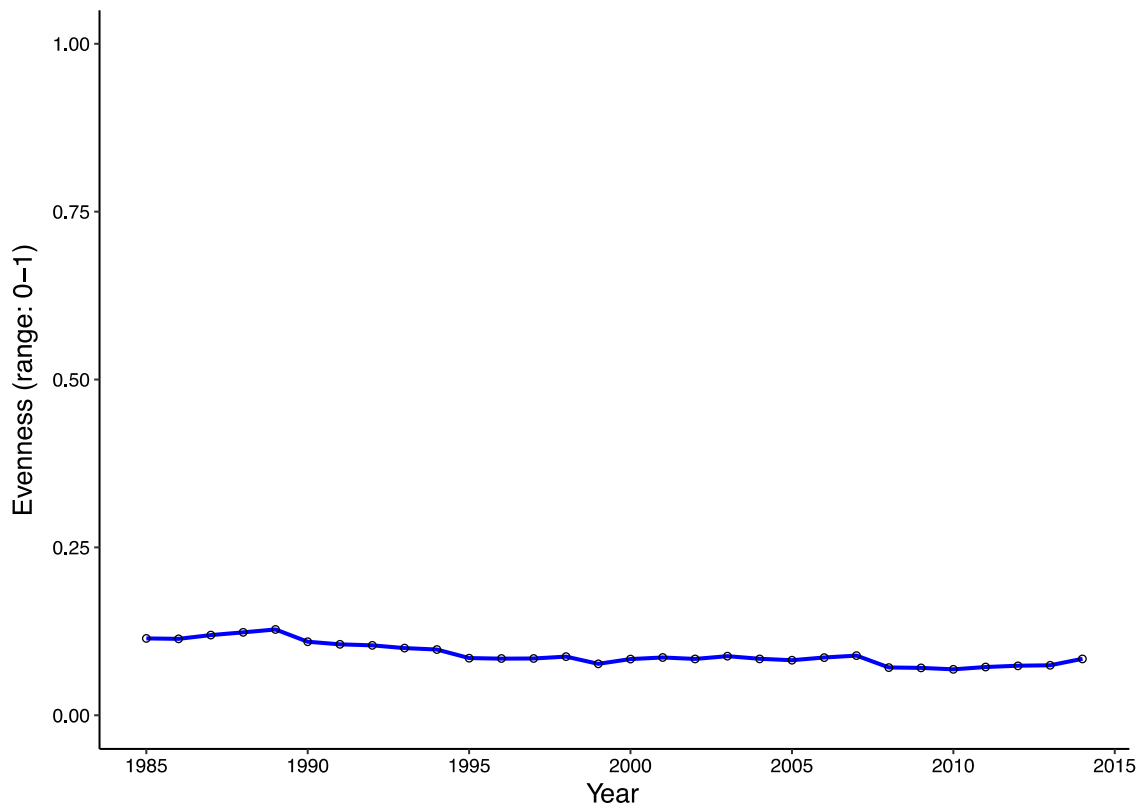

Fig. C. Proportion of editors from N = 24 environmental biology journals based in underrepresented (A) Global Regions and (B) National Income Categories (1985-2014).

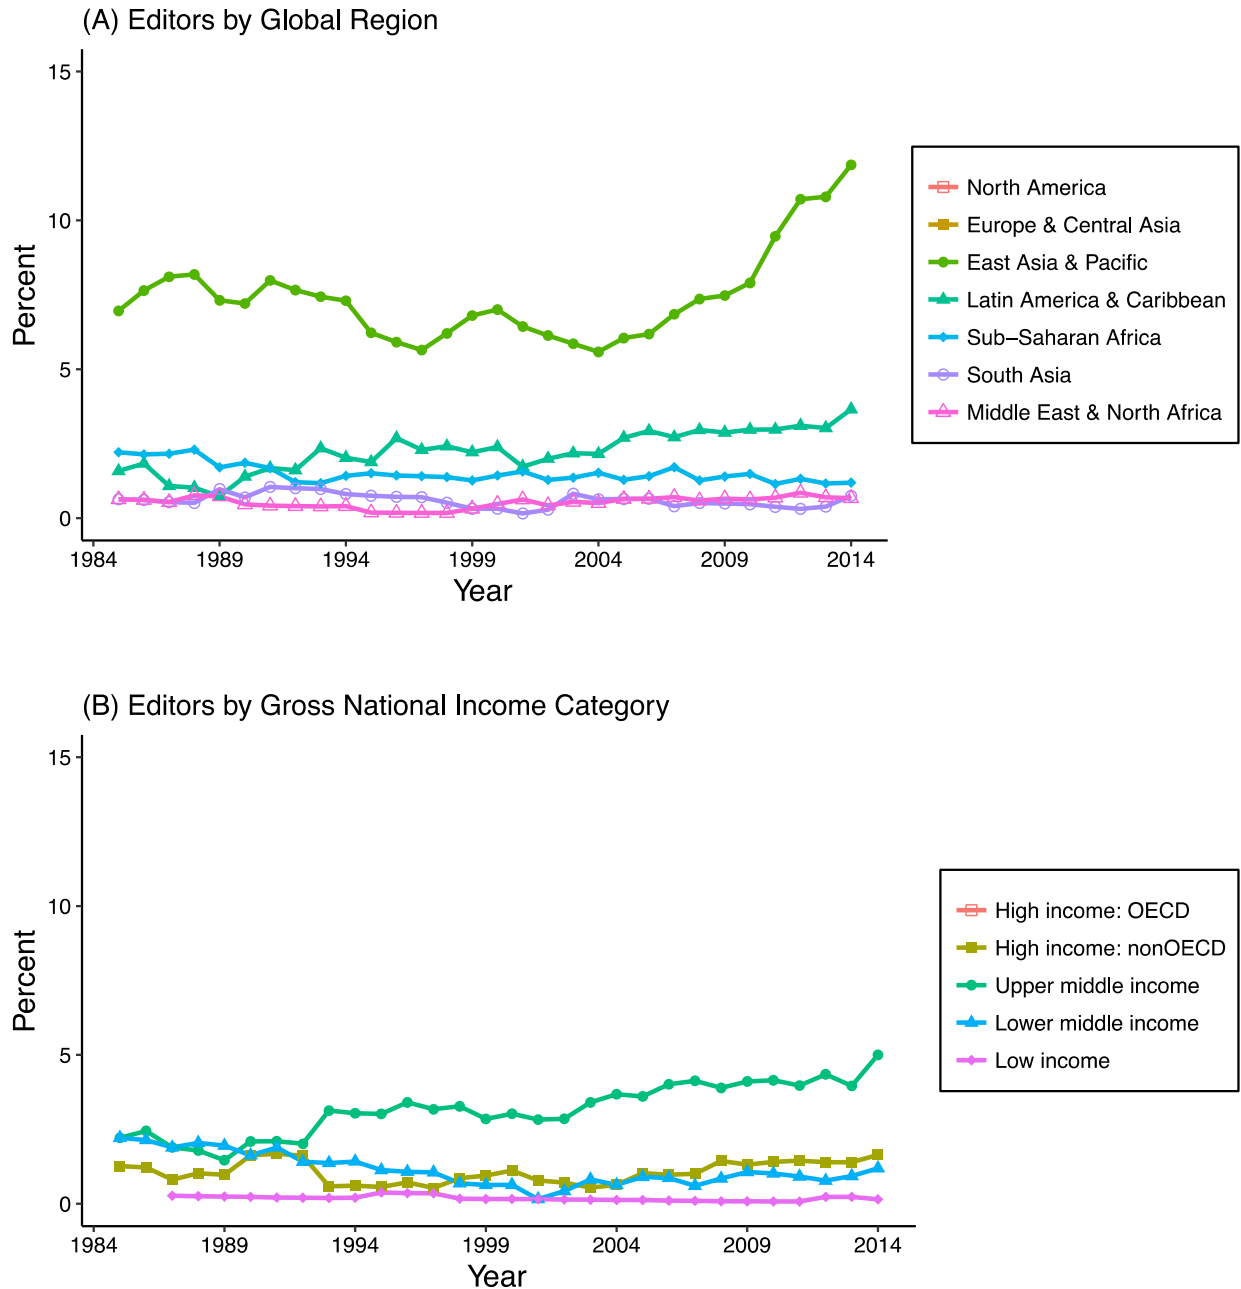



Fig. D. Percent change from 1985 to 2014 in the proportion of total Editors from different countries. Only countries with changes  $\pm 1\%$  are shown. All countries are classified as “High Income: OECD countries” by the World Bank except for China (blue bar), which is in the “Upper Middle Income” category. Abbreviations: GBR: Great Britain, NOR: Norway, CAN: Canada, USA: United States of America, CHN: China, NLD: Netherlands, FRA: France, AUS: Australia.

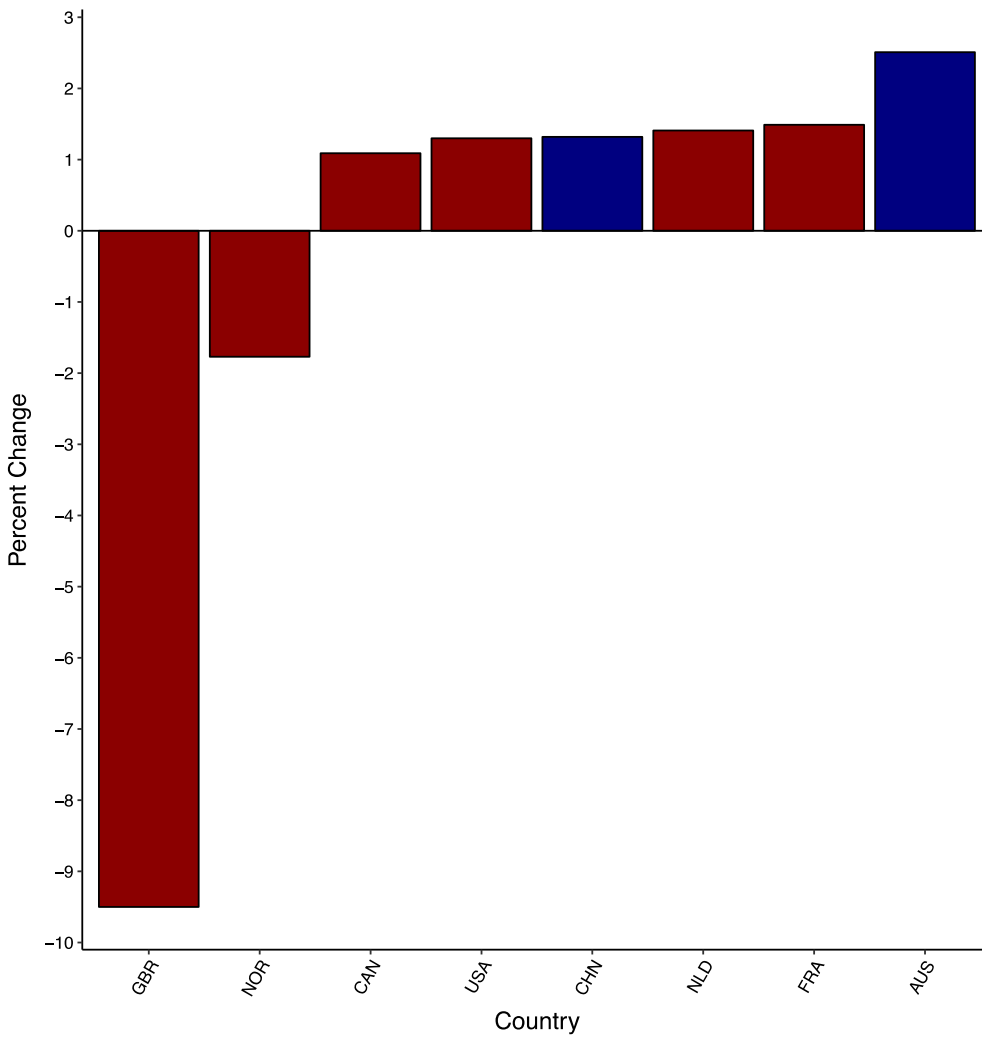

## REFERENCES

1. Holmgren M, Schnitzer SA. Science on the rise in developing countries. *Plos Biol.* 2004;2(1):e1. doi: 10.1371/journal.pbio.0020001.
2. Smith MJ, Weinberger C, Bruna EM, Allesina S. The scientific impact of nations: Journal placement and citation performance. *PLoS ONE.* 2014;9(10):e109195. doi: 10.1371/journal.pone.0109195.
3. Cho AH, Johnson SA, Schuman CE, Adler JM, Gonzalez O, Graves SJ, et al. Women are underrepresented on the editorial boards of journals in environmental biology and natural resource management. *PeerJ.* 2014;2:e542. doi: 10.7717/peerj.542.
4. Cho AH, Johnson SA, Schuman CE, Adler JM, Gonzalez O, Graves SJ, et al. Data from "Women are underrepresented on the editorial boards of journals in environmental biology and natural resource management (PeerJ)". 2014; Database: Dryad Digital Repository. Available from: <http://doi.org/10.5061/dryad.6jn86>.
5. Espin J, Sebastian Palmas, Carrasco-Rueda F, Riemer K, Allen PE, Berkebile N, et al. Data from: A persistent lack of international representation on editorial boards in environmental biology 2017; Data will be be uploaded to Dryad upon acceptance of the manuscript.
6. Stocks G, Seales L, Paniagua F, Maehr E, Bruna EM. The geographical and institutional distribution of ecological research in the tropics. *Biotropica.* 2008;40(4):397-404. doi: 10.1111/j.1744-7429.2007.00393.x.

7. The World Bank. World Bank Country and Lending Groups. 2017. Available from: <https://datahelpdesk.worldbank.org/knowledgebase/articles/906519-world-bank-country-and-lending-groups>.
8. Garcia-Carpintero E, Granadino B, Plaza LM. The representation of nationalities on the editorial boards of international journals and the promotion of the scientific output of the same countries. *Scientometrics*. 2010;84(3):799-811. doi: 10.1007/s11192-010-0199-3.
9. Braun T, Diospatonyi I. Counting the gatekeepers of international science journals a worthwhile science indicator. *Current Science*. 2005;89(9):1548-51.
10. Bohannon J. Restless minds. *Science*. 2017;356(6339):690-2. doi: 10.1126/science.356.6339.690.
11. Clark DB. Ecological field studies in the tropics: geographical origin of reports *Bulletin of the Ecological Society of America*. 1985;66:6-9.
12. Independent Commission on International Development Issues. North-South: a programme for survival: report of the Independent Commission on International Development Issues. Cambridge, MA: MIT Press; 1980.
13. Magurran AE. *Measuring biological diversity*. Oxford: Wiley-Blackwell; 2004.
14. R Core Team. *R: A language and environment for statistical computing*. 2016; R Foundation for Statistical Computing, Vienna, Austria. Available from: <https://www.r-project.org/>
15. Wickham H, Grolemund G. *R for data science*. Sebastopol, CA: O'Reilly; 2016.

16. Bruna EM. R code for analyses and figures in Espin et al. A persistent lack of international representation on editorial boards in environmental biology, v 1.0 (doi: -----; to be archived upon acceptance of the manuscript). 2017.
17. Bruna EM. GitHub repository for code used in Espin et al. A persistent lack of international representation on editorial boards in environmental biology. 2017. Available from: [https://github.com/embruna/Espin\\_etal\\_Editors](https://github.com/embruna/Espin_etal_Editors).
18. Oksanen J, Blanchet FG, Friendly M, Kindt R, Legendre P, McGlenn D, et al. vegan: Community Ecology Package. R package version 2.4-2. 2017; <https://cran.r-project.org/package=vegan>
19. Pinheiro J, Bates D, DebRoy S, Sarkar D, R Core Team. nlme: Linear and Nonlinear Mixed Effects Models. R package version 3.1-128. 2016; <https://cran.r-project.org/package=nlme>.
20. Bartoń K. MuMIn: Multi-Model Inference. R package version 1.15.6. 2016; <https://cran.r-project.org/package=MuMIn>
